# Supplementary material
Source: Royal Society of Chemistry journal article supplement (doi:10.1039/d6cp00299d)
Supplement: d6cp00299d1.pdf [file d6cp00299d1.pdf]

**Supplementary Materials for  
Tunable valley splitting and magnetic anisotropy in two-dimensional  
buckled honeycomb lattice  $\text{Mn}_2\text{X}_2$  ( $\text{X} = \text{F}, \text{Cl}, \text{Br}$ )**

Mingyu Lü<sup>1</sup>, Wendan Song<sup>1</sup>, Yuping Tian<sup>1</sup>, Chao-Bo Wang<sup>1</sup>, Xuefeng Dai,<sup>1</sup> Xudong Su<sup>1</sup>, Xiangru Kong<sup>1,\*</sup>,  
Wei-Jiang Gong<sup>1,\*</sup>

<sup>1</sup>College of Sciences, Northeastern University, Shenyang 110819, China

\*Corresponding authors: kongxiangru@mail.neu.edu.cn and gwj@mail.neu.edu.cn

TABLE S1: Calculated optimized lattice constants ( $a$ ), nearest Mn–Mn distances ( $d$ ), Mn–X–Mn angles ( $\alpha$ ), cohesive energy ( $\Delta E_{\text{coh}}$ ), and the energy differences of the FM and AFM2 states with respect to the AFM1 state (meV/unit cell).

| <i>Material</i>                 | $a$ (Å) | $d$ (Å) | $\alpha$ (°) | $\Delta E_{\text{coh}}$ (eV/atom) | $\Delta E_{\text{FM-AFM1}}$ | $\Delta E_{\text{AFM2-AFM1}}$ |
|---------------------------------|---------|---------|--------------|-----------------------------------|-----------------------------|-------------------------------|
| Mn <sub>2</sub> F <sub>2</sub>  | 3.07    | 2.64    | 91.7         | -4.180                            | 374.972                     | 281.069                       |
| Mn <sub>2</sub> Cl <sub>2</sub> | 3.37    | 2.66    | 84.9         | -3.297                            | 583.703                     | 480.695                       |
| Mn <sub>2</sub> Br <sub>2</sub> | 3.54    | 2.69    | 84.0         | -2.957                            | 621.503                     | 536.694                       |

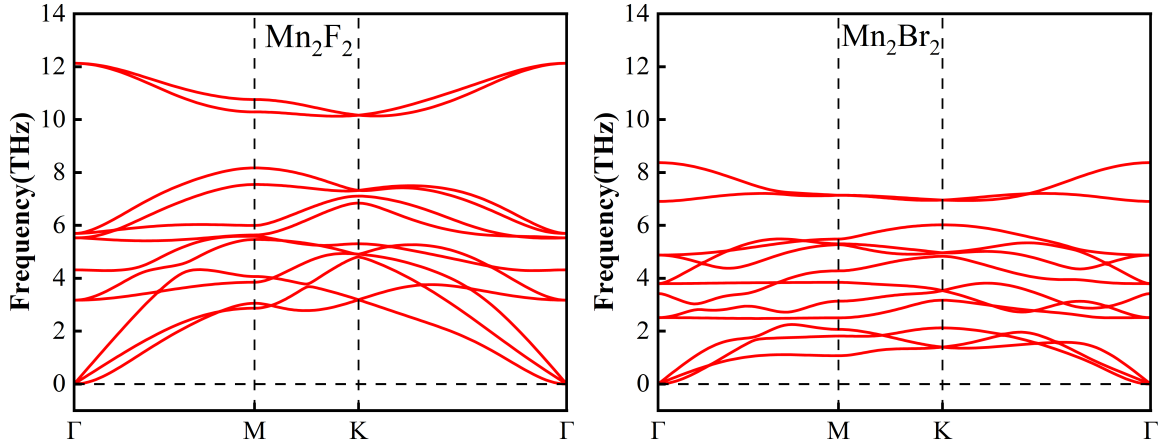

FIG. S1: Phonon spectra of Mn<sub>2</sub>Br<sub>2</sub> and Mn<sub>2</sub>F<sub>2</sub>.

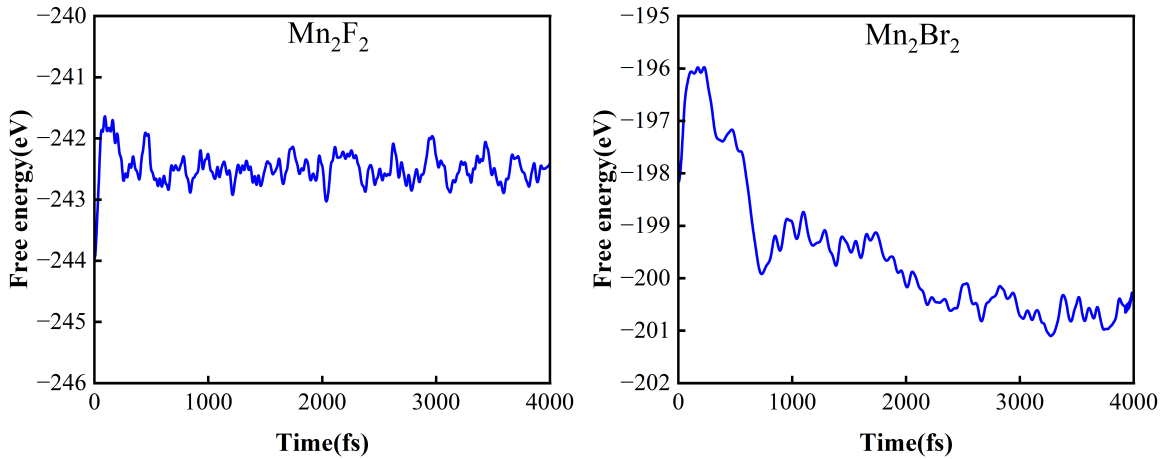

FIG. S2: AIMD simulations of Mn<sub>2</sub>Br<sub>2</sub> and Mn<sub>2</sub>F<sub>2</sub>.

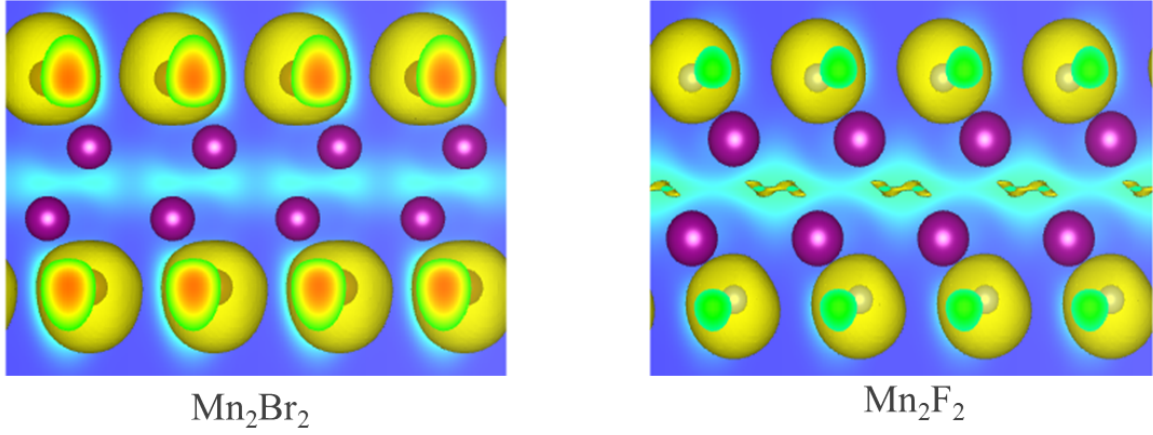

FIG. S3: ELF of  $\text{Mn}_2\text{Br}_2$  and  $\text{Mn}_2\text{F}_2$ .

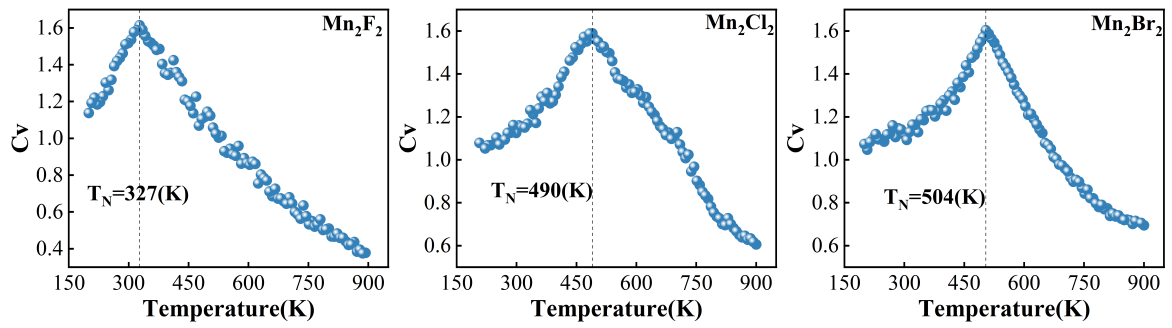

FIG. S4:  $T_N$  of monolayer  $\text{Mn}_2\text{X}_2$ .

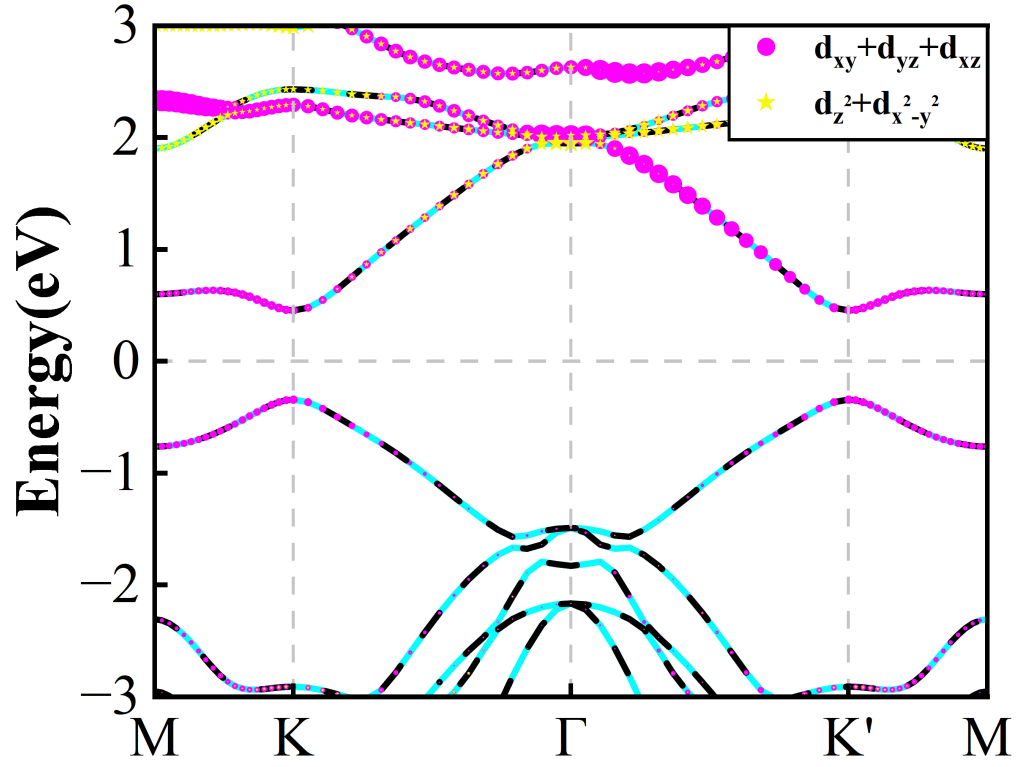

FIG. S5: PBAND of monolayer  $\text{Mn}_2\text{Br}_2$  without SOC.

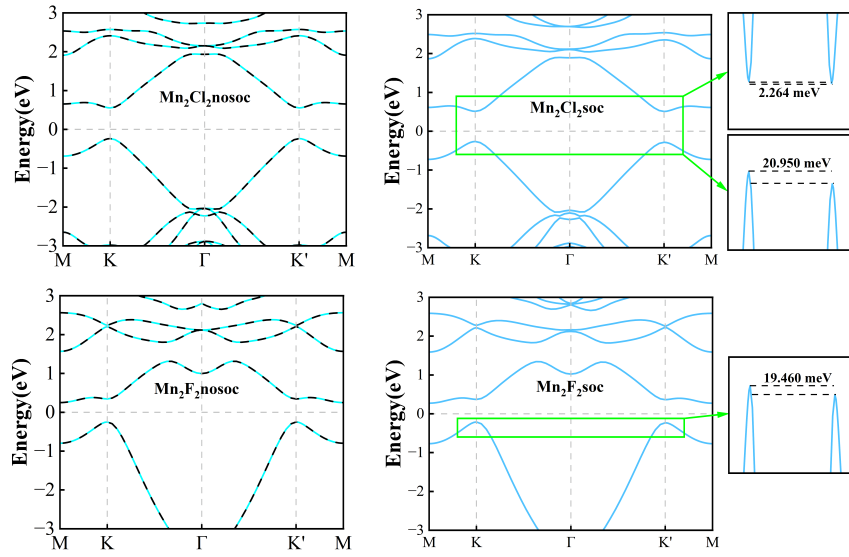

FIG. S6: Band structures of  $\text{Mn}_2\text{Cl}_2$  and  $\text{Mn}_2\text{F}_2$  with and without SOC.

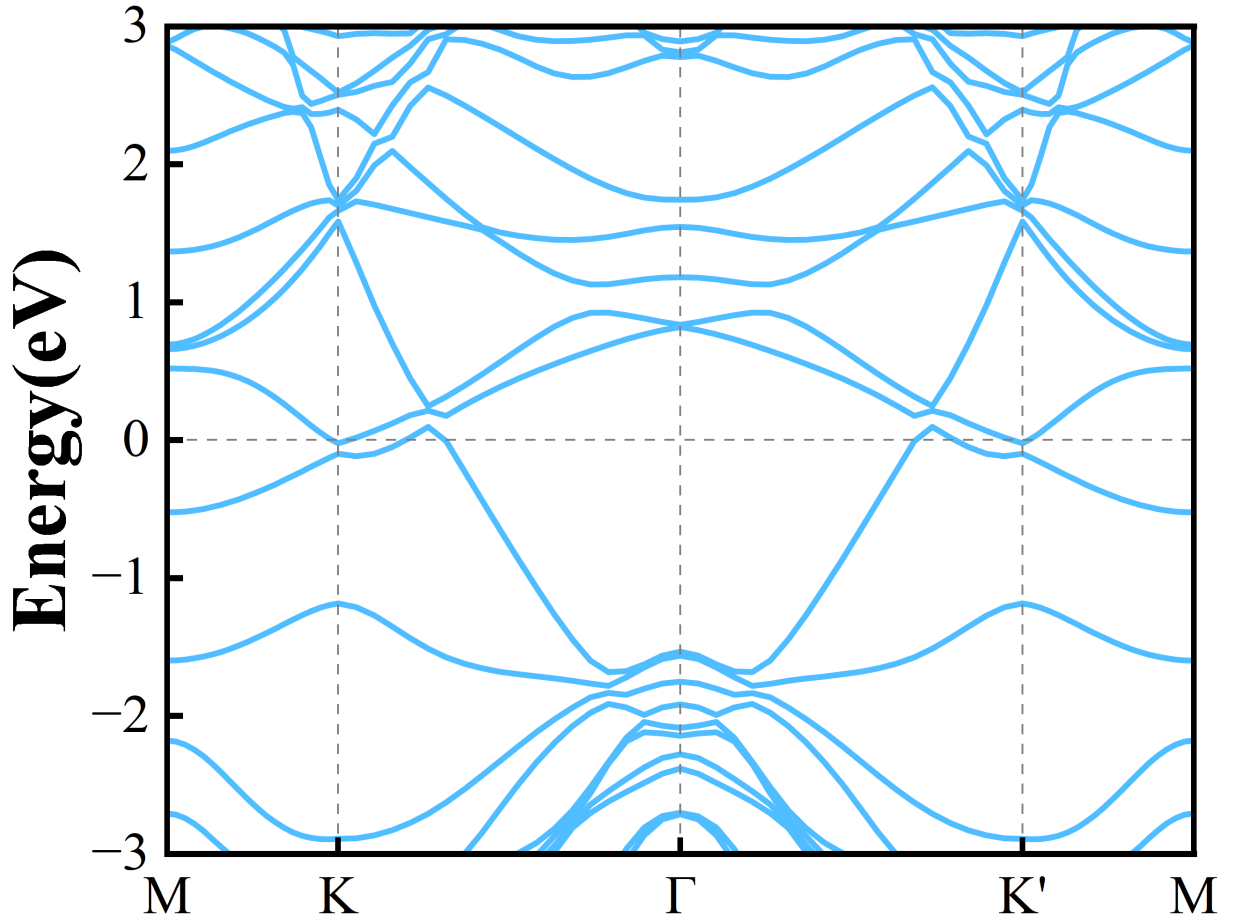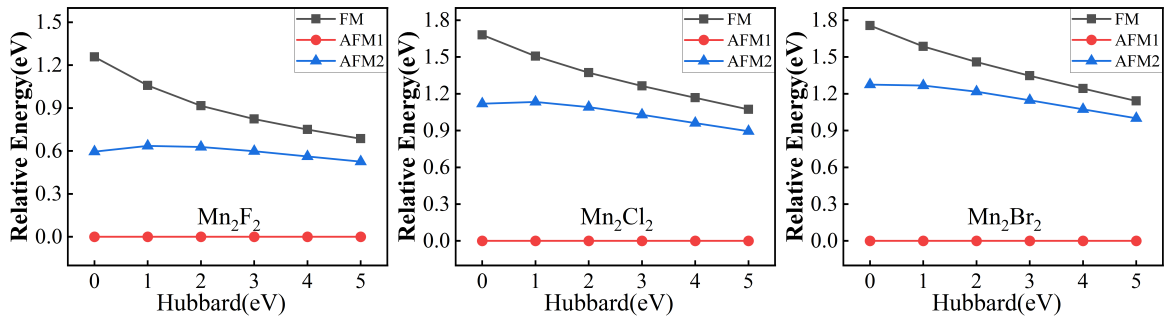

FIG. S8: Total energies of monolayer  $\text{Mn}_2\text{X}_2$  for different magnetic configurations as a function of the Hubbard  $U$ , with the energies measured relative to the AFM1 state.

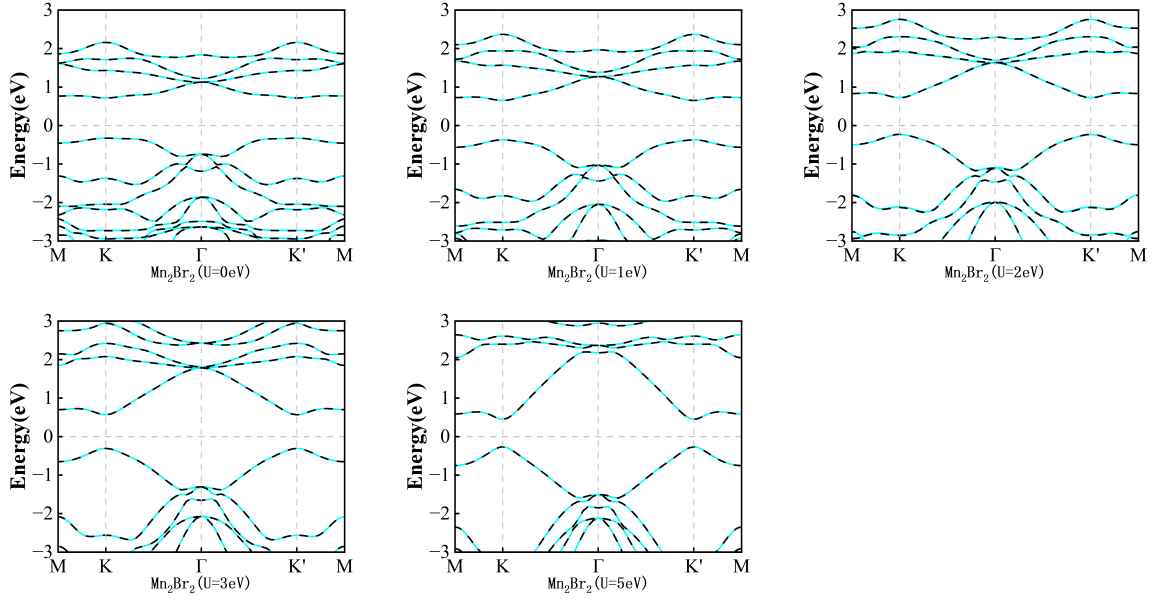

FIG. S9: Band structures of  $\text{Mn}_2\text{Br}_2$  without SOC under different Hubbard  $U$  values.

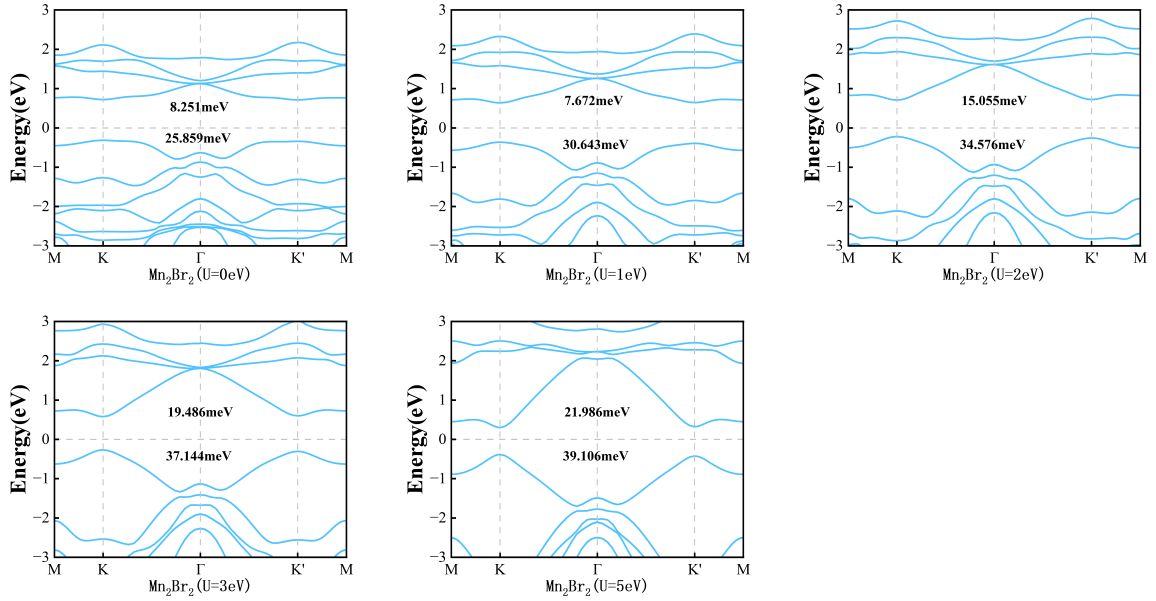

FIG. S10: Band structures of  $\text{Mn}_2\text{Br}_2$  with SOC under different Hubbard  $U$  values.

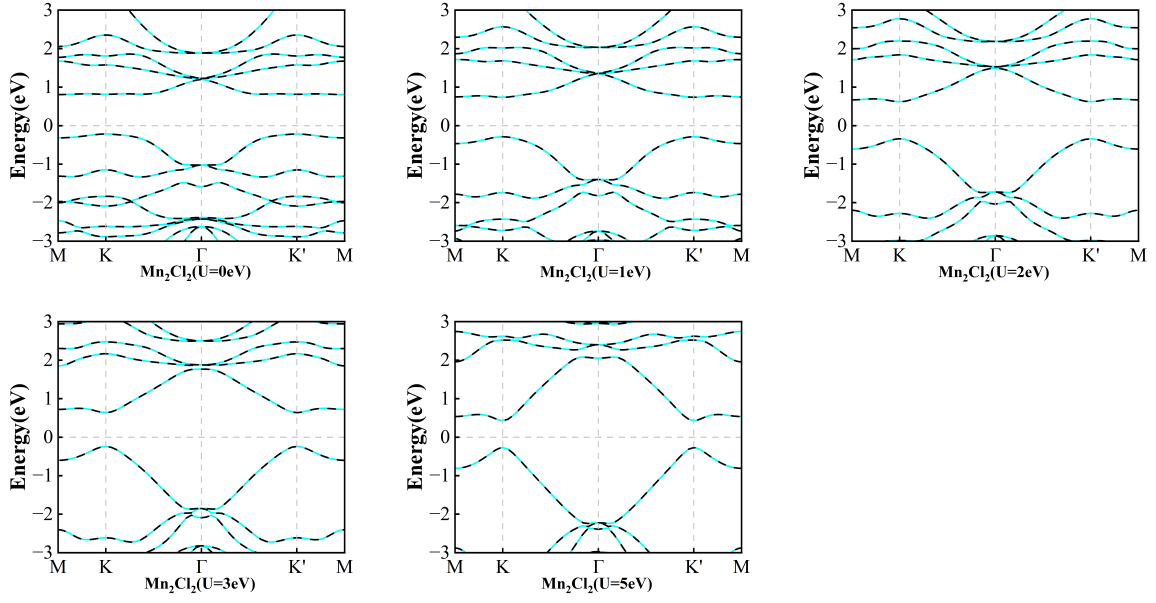

FIG. S11: Band structures of  $\text{Mn}_2\text{Cl}_2$  without SOC under different Hubbard  $U$  values.

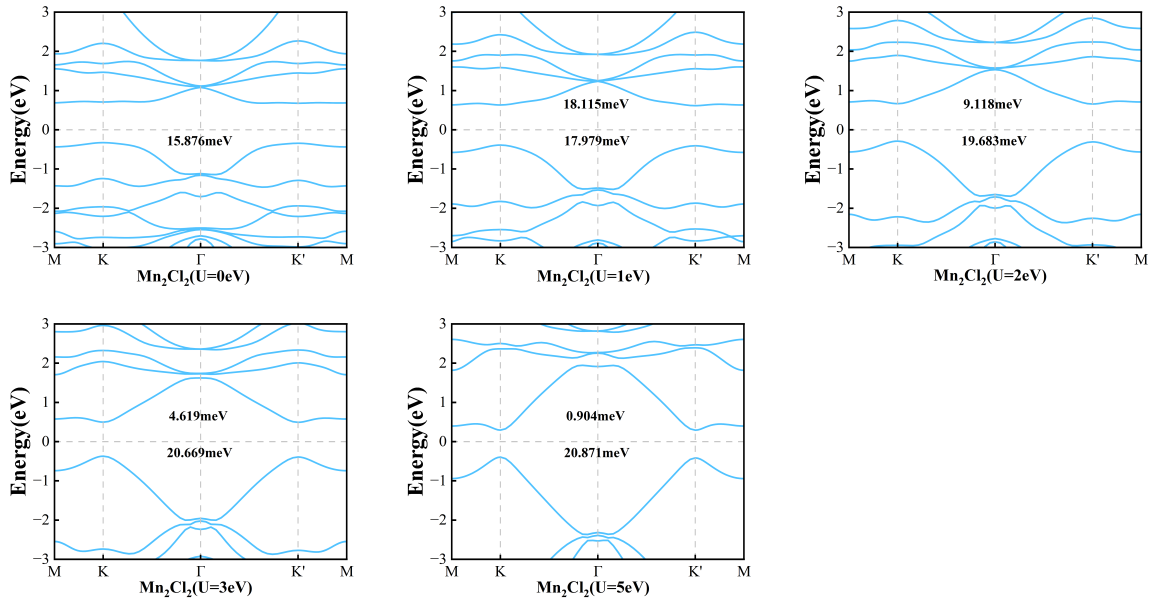

FIG. S12: Band structures of  $\text{Mn}_2\text{Cl}_2$  with SOC under different Hubbard  $U$  values.

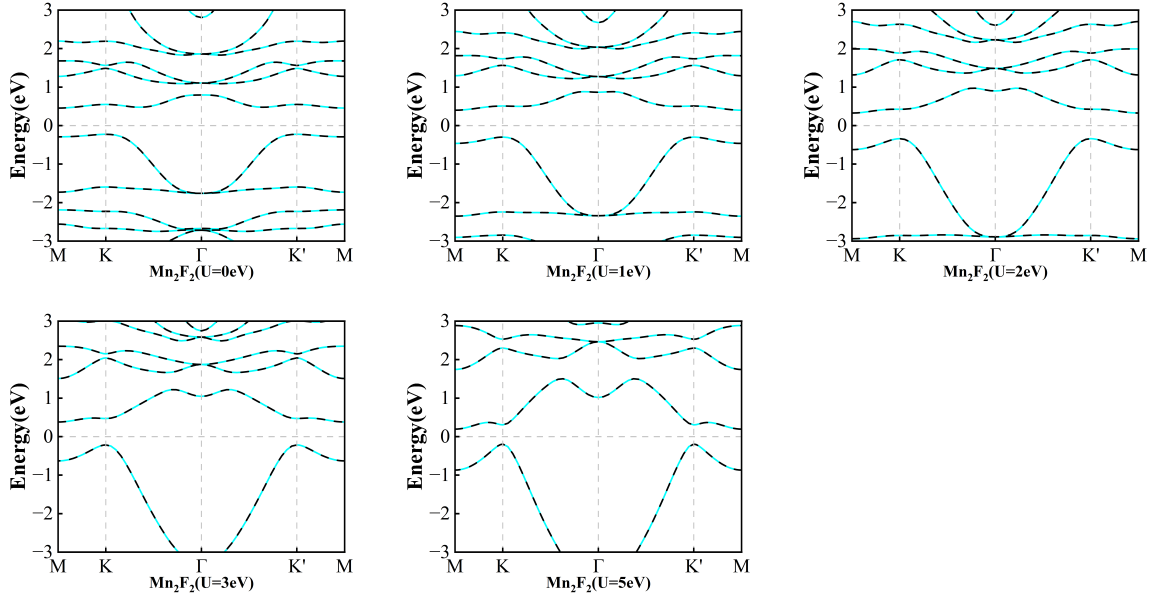

FIG. S13: Band structures of  $\text{Mn}_2\text{F}_2$  without SOC under different Hubbard  $U$  values.

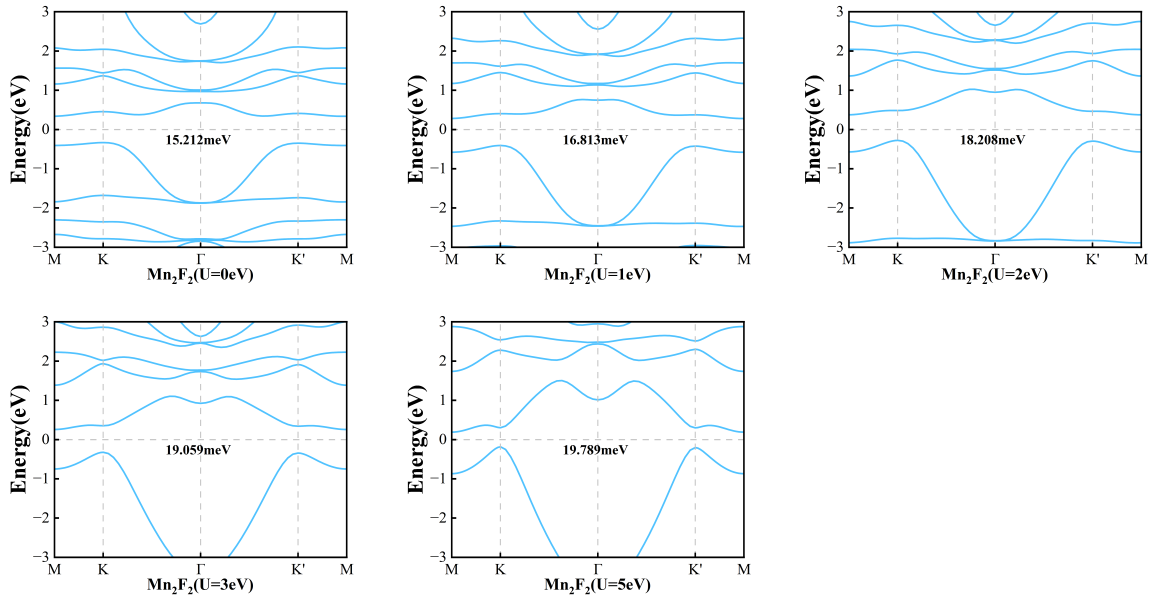

FIG. S14: Band structures of  $\text{Mn}_2\text{F}_2$  with SOC under different Hubbard  $U$  values.

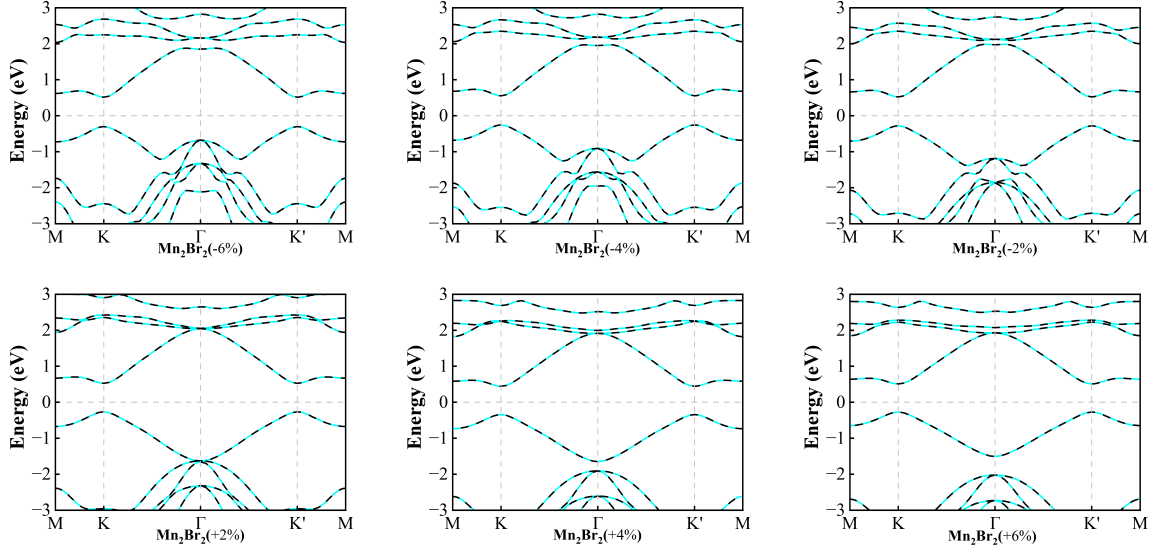

FIG. S15: Band structures of  $\text{Mn}_2\text{Br}_2$  without SOC under different strain values.

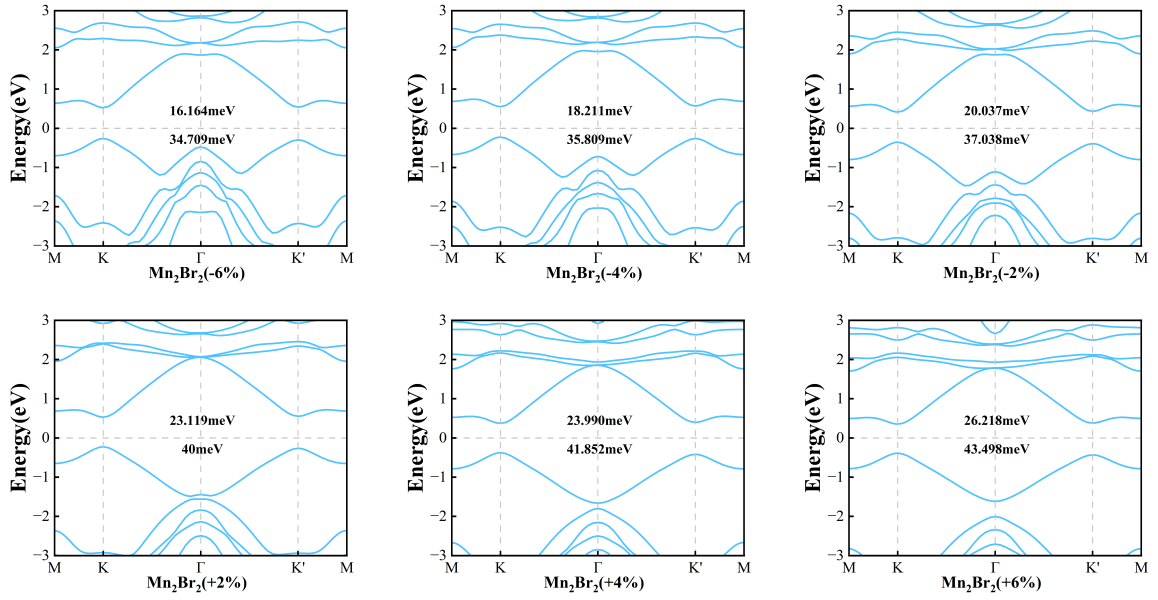

FIG. S16: Band structures of  $\text{Mn}_2\text{Br}_2$  with SOC under different strain values.

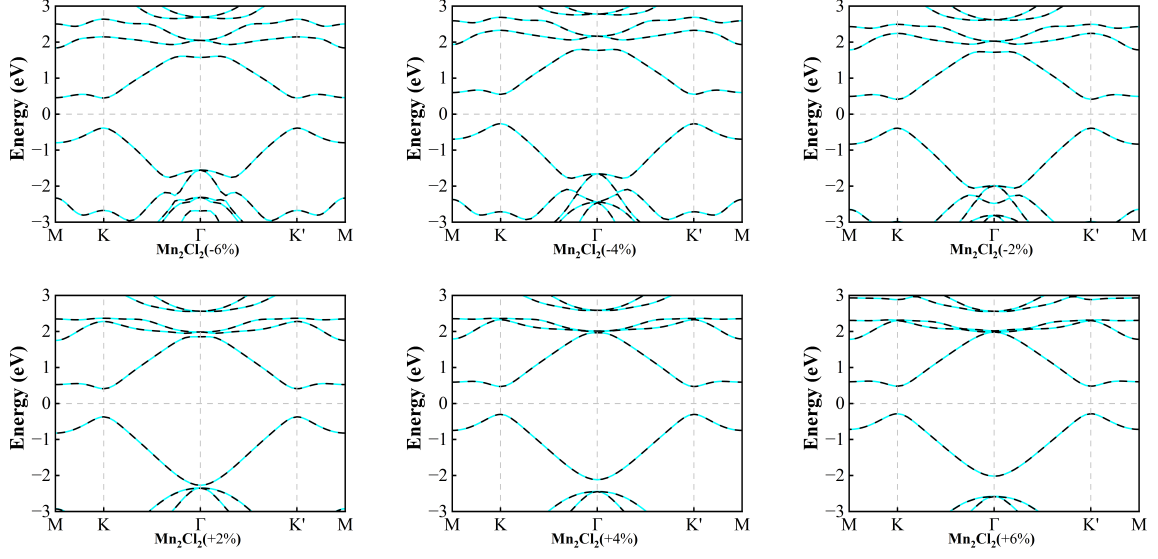

FIG. S17: Band structures of  $\text{Mn}_2\text{Cl}_2$  without SOC under different strain values.

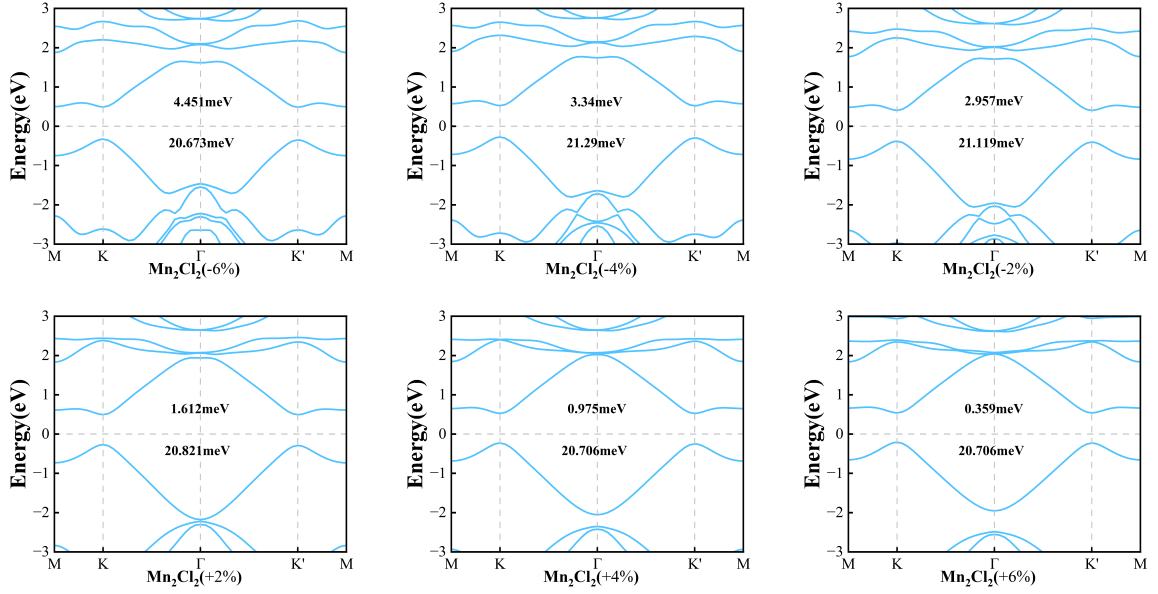

FIG. S18: Band structures of  $\text{Mn}_2\text{Cl}_2$  with SOC under different strain values.

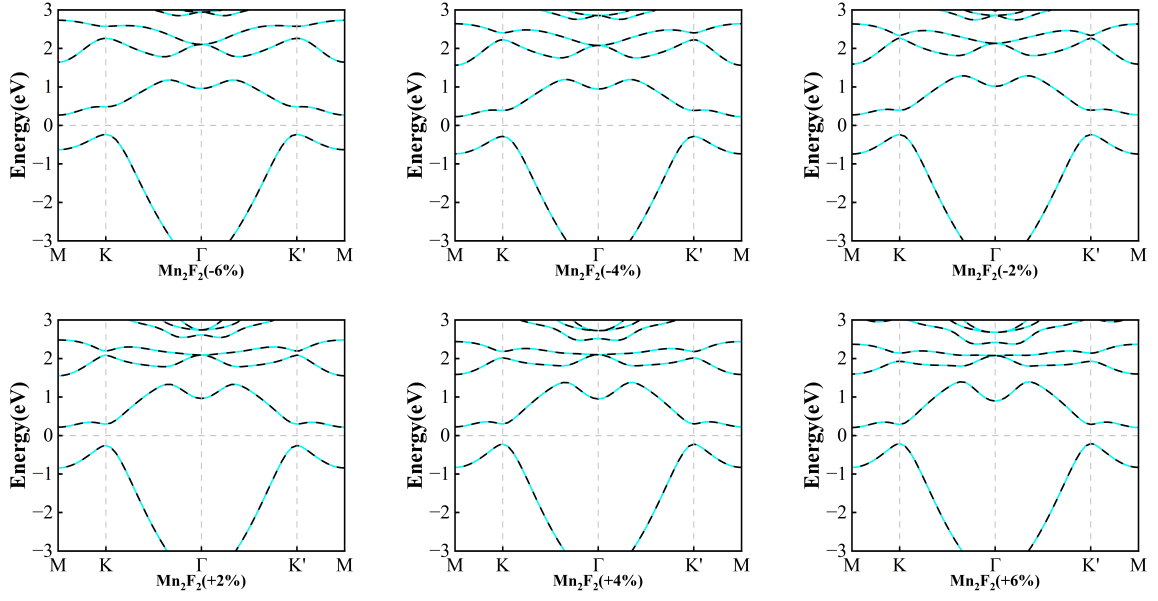

FIG. S19: Band structures of  $\text{Mn}_2\text{F}_2$  without SOC under different strain values.

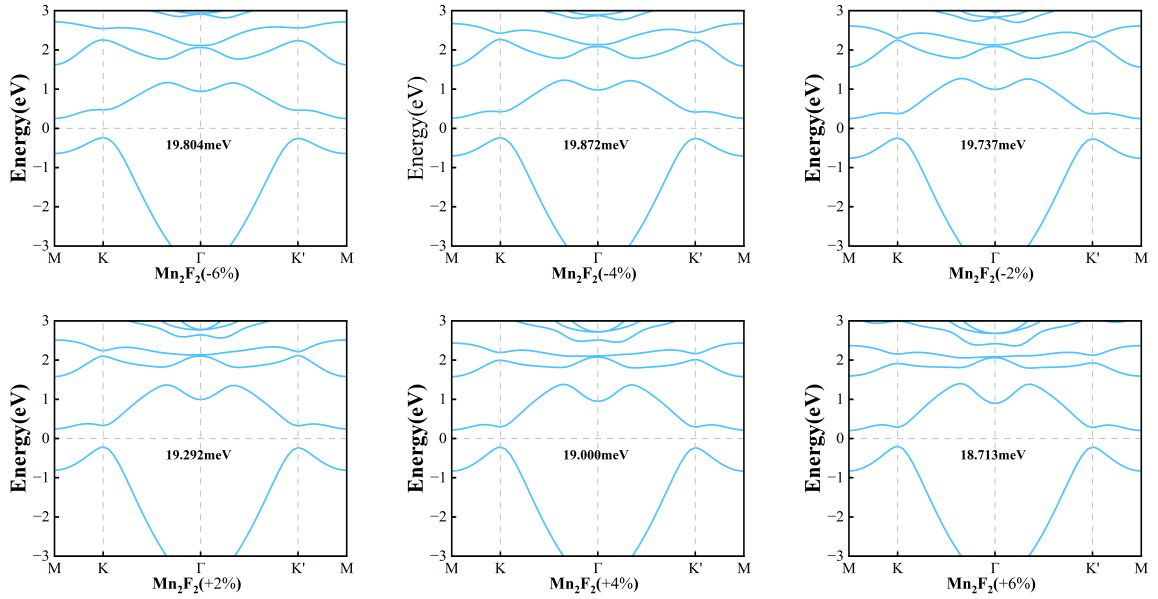

FIG. S20: Band structures of  $\text{Mn}_2\text{F}_2$  with SOC under different strain values.

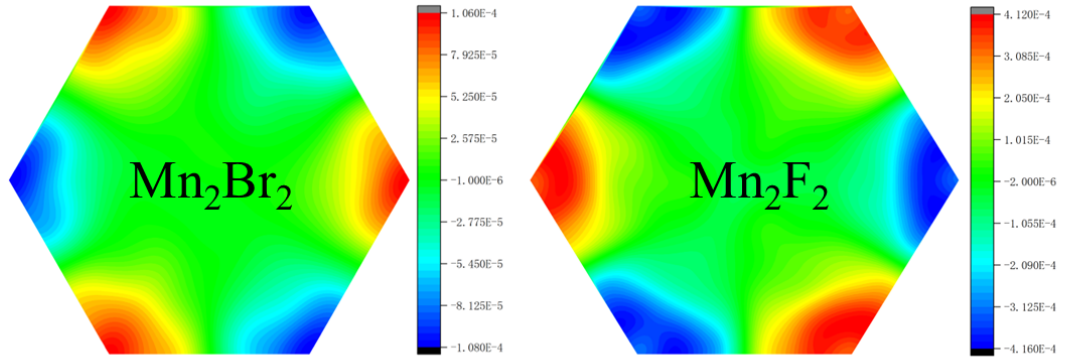

FIG. S21: Berry curvatures of monolayer  $\text{Mn}_2\text{Br}_2$  and  $\text{Mn}_2\text{F}_2$ .
